1 **Associations of Combined Phenotypic Aging and Genetic Risk with Incident**  
2 **Cancer: A Prospective Cohort Study**

3

4 Lijun Bian<sup>1,2†</sup>, Zhimin Ma<sup>1†</sup>, Xiangjin Fu<sup>1</sup>, Chen Ji<sup>1</sup>, Tianpei Wang<sup>1</sup>, Caiwang Yan<sup>1,2,3</sup>,  
5 Juncheng Dai<sup>1,2</sup>, Hongxia Ma<sup>1,2</sup>, Zhibin Hu<sup>1,2</sup>, Hongbing Shen<sup>1,2,4</sup>, Lu Wang<sup>3\*</sup>, Meng  
6 Zhu<sup>1,2,3\*</sup>, Guangfu Jin<sup>1,2,3\*</sup>

7

8 <sup>1</sup> Department of Epidemiology, Center for Global Health, School of Public Health,  
9 Nanjing Medical University, Nanjing, China.

10 <sup>2</sup> Jiangsu Key Lab of Cancer Biomarkers, Prevention and Treatment, Collaborative  
11 Innovation Center for Cancer Personalized Medicine and China International  
12 Cooperation Center for Environment and Human Health Nanjing Medical University,  
13 Nanjing, China.

14 <sup>3</sup> Department of Chronic Non-Communicable Disease Control, Wuxi Center for  
15 Disease Control and Prevention, Affiliated Wuxi Center for Disease Control and  
16 Prevention of Nanjing Medical University, Wuxi, China.

17 <sup>4</sup> Research Units of Cohort Study on Cardiovascular Diseases and Cancers, Chinese  
18 Academy of Medical Sciences, Beijing, China.

19

20 <sup>†</sup>These authors contributed equally to this work.

21 **\* Correspondence to:** Prof Guangfu Jin, Department of Epidemiology, Center for  
22 Global Health, School of Public Health, Nanjing Medical University, 101 Longmian  
23 Rd., Nanjing 211166, China. Email: [guangfujin@njmu.edu.cn](mailto:guangfujin@njmu.edu.cn); or Prof Meng Zhu,  
24 Department of Epidemiology, Center for Global Health, School of Public Health,  
25 Nanjing Medical University, 101 Longmian Rd., Nanjing 211166, China. E-mail:  
26 [zhmnmjmu@njmu.edu.cn](mailto:zhmnmjmu@njmu.edu.cn); or Prof Lu Wang, Department of Chronic

27 Non-Communicable Disease Control, Wuxi Center for Disease Control and  
28 Prevention, Affiliated Wuxi Center for Disease Control and Prevention of Nanjing  
29 Medical University, 499 Jincheng Rd., Wuxi 214023, China. E-mail:  
30 wanglu123@njmu.edu.cn.

31 **Abstract**

32 **Background**

33 Age is the most important risk factor for cancer, but aging rates are heterogeneous  
34 across individuals. We explored a new measure of aging-Phenotypic Age  
35 (PhenoAge)-in the risk prediction of site-specific and overall cancer.

36 **Methods**

37 Using Cox regression models, we examined the association of Phenotypic Age  
38 Acceleration (PhenoAgeAccel) with cancer incidence by genetic risk group among  
39 374,463 participants from the UK Biobank. We generated PhenoAge using  
40 chronological age and 9 biomarkers, PhenoAgeAccel after subtracting the effect of  
41 chronological age by regression residual, and an incidence weighted overall cancer  
42 polygenic risk score (CPRS) based on 20 cancer site-specific polygenic risk scores  
43 (PRSs).

44 **Results**

45 Compared with biologically younger participants, those older had a significantly  
46 higher risk of overall cancer, with hazard ratios (HRs) of 1.22 (95% confidence  
47 interval, 1.18-1.27) in men, 1.26 (1.22-1.31) in women, respectively. A joint effect of  
48 genetic risk and PhenoAgeAccel was observed on overall cancer risk, with HRs of  
49 2.29 (2.10-2.51) for men and 1.94 (1.78-2.11) for women with high genetic risk and  
50 older PhenoAge compared with those with low genetic risk and younger PhenoAge.  
51 PhenoAgeAccel was negatively associated with the number of healthy lifestyle factors  
52 (Beta = -1.01 in men,  $P < 0.001$ ; Beta = -0.98 in women,  $P < 0.001$ ).

53 **Conclusions**

54 Within and across genetic risk groups, older PhenoAge was consistently related to an  
55 increased risk of incident cancer with adjustment for chronological age and the aging  
56 process could be retarded by adherence to a healthy lifestyle.

57 **Key Words:** Phenotypic aging; Polygenic risk score; Healthy lifestyle; Cancer risk.

## 58 **Introduction**

59 Cancer continues to be the leading cause of death globally and the reduction of  
60 cancer-related deaths remains to be a public health priority (Bray et al., 2018). The  
61 morbidity and mortality of cancer increase dramatically with age, which demonstrated  
62 that aging is the greatest risk factor for cancer (Siegel, Miller, & Jemal, 2018).

63 Although everyone gets older, individuals are aging at different rates (Rutledge, Oh,  
64 & Wyss-Coray, 2022). Therefore, the variation in the pace of aging between-person  
65 may reflect the differences in susceptibility to cancer and death. Thus, measurement  
66 of an individual's biological age, particularly at the early stage of life, may promote  
67 the primary and secondary prevention of cancer through earlier identification of high  
68 risk groups.

69 Recently, Morgan and colleagues developed and validated a novel multi-system-based  
70 aging measurement (Levine et al., 2018), Phenotypic Age (PhenoAge), which has  
71 been shown to capture long-term vulnerability to diseases like COVID-19, and  
72 strongly predict morbidity and mortality risk in diverse populations (Kuo, Pilling,  
73 Atkins, et al., 2021; Liu et al., 2018). However, it is largely unknown whether  
74 PhenoAge can predict overall cancer risk and identify high risk individuals for  
75 potential personalized prevention.

76 To date, more than 2,000 genetic loci have been identified as susceptibility markers  
77 for certain cancers by genome-wide association studies (GWAS) (Buniello et al.,  
78 2019). Although the effect of these individual loci is relatively modest on cancer risk,  
79 a polygenic risk score (PRS) combining multiple loci together as an indicator of  
80 genetic risk has been proved to effectively predict incidence of site-specific cancer  
81 (Dai et al., 2019; Lecarpentier et al., 2017; Mars et al., 2020). Recently, we  
82 systematically created site-specific cancer PRS for 20 cancer types, and constructed  
83 an incidence-weighted cancer polygenic risk score (CPRS) to assess the effect of  
84 genetic risk on overall incident cancer risk based on the UK Biobank (Zhu et al.,  
85 2021). Previous study had indicated an interaction between genetic factor and age on

86 cancer risk (Mavaddat et al., 2015). However, the extent to interaction between  
87 genetic factor and PhenoAge on overall cancer risk remained unclear.

88 In this study, we calculated PhenoAge in accordance with the method described  
89 previously and then evaluated the effectiveness of PhenoAge in predicting risk of  
90 overall cancer in the UK Biobank. We also assessed the extent to which a level of  
91 accelerated aging was associated with an increased overall cancer risk across groups  
92 with a different genetic risk defined by the CPRS.

93

## 94 **Methods**

### 95 **Participants**

96 The participants included in this study are derived from the UK Biobank. The UK  
97 Biobank is a large population-based cohort study and detail protocol is publicly  
98 available (Bycroft et al., 2018). In brief, approximately 500,000 participants aged  
99 40-70 were recruited from 22 assessment centers across England, Scotland, and Wales  
100 between 2006 and 2010 at baseline. Each eligible participant completed a written  
101 informed consent form and provided information on lifestyle and other potentially  
102 health-related aspects through extensive baseline questionnaires, interviews, and  
103 physical measurements. Meanwhile, biological samples of participants were also  
104 collected for biomarker assays and a blood draw was collected for genotyping. The  
105 UK Biobank study has approval from the Multi-center Research Ethics Committee,  
106 the National Information Governance Board for Health and Social Care in England  
107 and Wales, and the Community Health Index Advisory Group in Scotland  
108 (<http://www.ukbiobank.ac.uk/ethics/>).

### 109 **PhenoAge**

110 We calculated PhenoAge in accordance with the method described previously (Levine  
111 et al., 2018). Briefly, PhenoAge is calculated based on 9 biomarkers (albumin,  
112 creatinine, glucose, [log] C-reactive protein [CRP], lymphocyte percent, mean cell

113 volume, red blood cell distribution width, alkaline phosphatase, and white blood cell  
114 count) and chronological age that were selected using a Cox proportional hazard  
115 elastic net model for mortality based on 10-fold cross-validation. The Biomarkers in  
116 the UK Biobank were measured at baseline (2006-2010) for all participants. To  
117 correct distribution skewness, we set the top and bottom 1% of values to the 99th and  
118 1st percentiles. The formula of PhenoAge is given by

$$\text{PhenoAge} = 141.50 + \frac{\ln \left\{ (-0.00553) \times \frac{(-1.51714) \times \exp(xb)}{0.0076927} \right\}}{0.09165}$$

119 where

$$\begin{aligned}xb = & -19.907 - 0.0336 \times \text{albumin} + 0.0095 \times \text{creatinine} + 0.1953 \times \text{glucose} \\ & + 0.0954 \times \ln(\text{CRP}) - 0.0120 \times \text{lymphocytepercentage} + 0.0268 \\ & \times \text{mean corpuscular volume} + 0.3306 \\ & \times \text{red blood cell distribution width(RDW)} + 0.00188 \\ & \times \text{alkaline phosphatase} + 0.0554 \times \text{white blood cell count} \\ & + 0.0804 \times \text{age}\end{aligned}$$

120

121 Finally, we calculated Phenotypic Age Acceleration (PhenoAgeAccel), which was  
122 defined as the residual resulting from a linear model when regressing Phenotypic Age  
123 on chronological age. Therefore, PhenoAgeAccel represents Phenotypic Age after  
124 accounting for chronological age (i.e., whether a person appears older [positive value]  
125 or younger [negative value] than expected, biologically, based on his/her age).

## 126 **PRS calculation and CPRS construction**

127 The calculation of site-specific cancer PRSs and the construction of CPRSs have been  
128 described in our previous published study (Zhu et al., 2021). In brief, for individual  
129 cancer, risk associated single nucleotide polymorphisms (SNPs) and corresponding  
130 effect sizes were derived from the largest published GWASs in terms of sample size.

131 Next, the dosage of each risk allele for each individual was summed after  
132 multiplication with its respective effect size of site-specific cancer. Except for  
133 non-melanoma skin cancer and those without relevant GWAS or significant genetic  
134 loci published by now, we derived PRSs for 20 cancer types in this analysis. To  
135 generate an indicator of genetic risk for overall cancer, we constructed the CPRS as  
136 follows:

$$CPRS_i = \sum_{k=1}^K h_k PRS_{i,k}$$

137 Where  $CPRS_i$  is the cancer polygenic risk score of  $i^{\text{th}}$  individual,  $h_k$  is the  
138 age-standardized incidence of site-specific cancer  $k$  in UK population, and  $PRS_{i,k}$  is  
139 the aforementioned PRS of site-specific cancer  $k$ . Given the different spectrum of  
140 cancer incidence between men and women, CPRS were constructed for males and  
141 females, respectively.

#### 142 **Assessment of healthy lifestyle**

143 We adopted five healthy lifestyle factors according to the World Cancer Research  
144 Fund/American Institute of Cancer Research recommendations  
145 (<https://www.aicr.org/cancer-prevention/>) (Shams-White et al., 2019), i.e., no current  
146 smoking, no alcohol consumption, regular physical activity, moderate BMI  
147 (body-mass index, 18.5~30), and a healthy diet pattern. Participants of no current  
148 smoking were defined as never smoker or former smokers who had quit smoking at  
149 least 30 years. No alcohol consumption was defined as never alcohol use. Regular  
150 physical activity was defined as at least 75 minutes of vigorous activity per week or  
151 150 minutes of moderate activity per week (or an equivalent combination) or  
152 engaging in vigorous activity once and moderate physical activity at least 5 days a  
153 week (Lourida et al., 2019). A healthy diet pattern was ascertained consumption of an  
154 increased amount of fruits, vegetables, whole grains, fish and a reduced amount of red  
155 meats and processed meats (Lourida et al., 2019). The lifestyle index ranged from 0 to  
156 5, with higher index indicating a healthier lifestyle.

157 **Outcomes**

158 Outcomes of incident cancer events in the UK Biobank were ascertained through  
159 record electronic linkage with the National Health Service central registers and death  
160 registries in England, Wales and Scotland. Complete follow-up was updated to 31  
161 October 2015 for Scotland, and to 31 March 2016 for England & Wales. Cancer  
162 events were coded using the 10<sup>th</sup> Revision of the International Classification of  
163 Diseases. The outcome of all cancer events were obtained from data field 40006 and  
164 40005 of the UK Biobank.

165 **Statistical analysis**

166 Cancer risk of participants in the UK Biobank was assessed from baseline until to the  
167 date of diagnosis, death, loss to follow-up, or date of complete follow-up, whichever  
168 occurred first. Multivariable Cox proportional hazards regression analyses were  
169 performed to assess associations between PhenoAgeAccel and cancer risk and to  
170 estimate hazard ratios (HRs) as well as 95% confidence intervals (CI). Schoenfeld  
171 residuals and log-log inspection were used to test the assumption of proportional  
172 hazards. HRs associated with per 5 years increased of PhenoAgeAccel was calculated  
173 for site-specific cancer and overall cancer respectively. In addition, we compared HRs  
174 between biologically younger and older participants, and calculated HRs for  
175 participants at low (the bottom quintile of PhenoAgeAccel), intermediate (quintiles  
176 2-4), and high (the top quintile) accelerated aging.

177 Meanwhile, participants were also divided into low (the bottom quintile of CPRS),  
178 intermediate (quintiles 2-4), and high (the top quintile) genetic risk groups. Absolute  
179 risk within each subgroup defined by PhenoAgeAccel and CPRS were calculated as  
180 the percentage of incident cancer cases occurring in a given group. We calculated  
181 absolute risk increase as the difference in cancer incidences among given groups,  
182 extrapolated the difference in 5-year event rates among given groups. The 95% CIs  
183 for the absolute risk increase were derived by drawing 1,000 bootstrap samples from  
184 the estimation dataset. We performed additive interaction analysis between genetic



185 and PhenoAgeAccel categories by using two indexes: the relative excess risk due to  
186 interaction (RERI) and the attributable proportion due to interaction (AP) (R. Li &  
187 Chambless, 2007). The 95% CIs of the RERI and AP were estimated by bootstrap ( $N$   
188 = 5,000), which would contain 0 if there was no additive interaction. We also used  
189 multivariable linear regression models to assess associations between the  
190 PhenoAgeAccel and individual lifestyle factors with adjustment for age, family  
191 history of cancer, Townsend deprivation index, height, and the first 10 principal  
192 components of ancestry. All the above mentioned analyses were performed for men  
193 and women separately.

194 Participants with missing data on any of the covariates were multiple imputed, and  
195 independent analyses were also performed based on complete data for sensitivity  
196 analyses. Besides, to examine the reliability of our results, we conducted several  
197 sensitivity analyses: (i) reclassifying PhenoAgeAccel levels based on quartiles  
198 (bottom, 2-3, and top quartiles defined as low, intermediate, and high accelerated  
199 aging, respectively) or tertiles (corresponding to low, intermediate, and high  
200 accelerated aging) of PhenoAgeAccel; (ii) reevaluating the effect of PhenoAgeAccel  
201 based on participants of unrelated British ancestry; and (iii) excluding incident cases  
202 of any cancer occurring during the two years of follow-up. All  $P$  values were  
203 two-sided and  $P < 0.05$  was considered statistically significant. All statistical analyses  
204 were performed with R software, version 3.6.3 (R Project for Statistical Computing).

205

## 206 **Results**

### 207 **Participants**

208 After removing participants who had withdrawn their consent, had been diagnosed  
209 with cancer before baseline, failed to be genotyped, reported a mismatch sex with  
210 genetic data, or with missing data on PhenoAge, the final analytic dataset included  
211 374,463 eligible participants (173,431 men and 201,032 women). Of which, 169,573  
212 participants were biologically older, with 92,189 men and 77,384 women, whose

213 median PhenoAgeAccel were 3.28 (interquartile range [IQR]: 1.50-6.06) and 3.07  
214 (IQR: 1.33-5.79) respectively; 204,890 participants were biologically younger, with  
215 81,242 men and 123,648 women, whose median PhenoAgeAccel were -2.61 (IQR:  
216 -4.35--1.25) and -3.55 (IQR: -5.64--1.81) respectively (**Table 1, Appendix 1-figure 1**).

### 217 **Associations of PhenoAgeAccel with cancer risk**

218 There were 22,370 incident cancer cases, with 11,532 men and 10,838 women, during  
219 a median follow-up of 7.09 years (IQR: 6.35-7.72). The PhenoAgeAccel was  
220 significantly associated with increased risk for cancer sites of lip-oral cavity-pharynx,  
221 esophagus, stomach, colon-rectum, pancreas, lung, breast, cervix uteri, corpus uteri,  
222 prostate, kidney, bladder, multiple myeloma, Hodgkin's disease, and lymphoid  
223 leukaemia, while negatively associated with risk of prostate cancer after adjusting for  
224 chronological age and other covariates (**Figure 1, Appendix 1-table 1**).

225 For overall cancer, we observed an obviously higher distribution of PhenoAgeAccel  
226 in incident cancer cases than participants without incident cancer in both men and  
227 women (**Figure 2A and B**). PhenoAgeAccel was significantly associated with an  
228 increased risk of overall cancer in men (HR = 1.15, 95% CI, 1.13-1.17,  $P < 0.0001$ )  
229 and women (HR = 1.15, 95% CI, 1.13-1.17,  $P < 0.0001$ ) per 5 years increase (**Table**  
230 **2**). We also observed a significantly gradient increase in incident cancer risk from  
231 decile 1 to decile 10 of PhenoAgeAccel (**Figure 2C and D**). Compared with  
232 biologically younger participants, those older had a significantly higher risk of overall  
233 cancer, with HRs of 1.22 (95% CI, 1.18-1.27,  $P < 0.0001$ ) in men, 1.26 (95% CI,  
234 1.22-1.31,  $P < 0.0001$ ) in women, respectively (**Figure 2E and F**). Besides, Compared  
235 with individuals at low accelerated aging (the bottom quintile of PhenoAgeAccel),  
236 those in the intermediate (quintiles 2 to 4) and high accelerated aging (the top quintile)  
237 had a significantly higher risk of overall cancer, with HRs of 1.15 (95% CI, 1.09-1.21,  
238  $P < 0.0001$ ) and 1.44 (95% CI, 1.36-1.53,  $P < 0.0001$ ) in men, 1.15 (95% CI,  
239 1.09-1.21,  $P < 0.0001$ ) and 1.46 (95% CI, 1.38-1.55,  $P < 0.0001$ ) in women,  
240 respectively. These results did not change after adjustment for genetic risk and  
241 lifestyle factors (**Table 2**). Similar patterns were noted in a series of sensitivity

242 analyses with reclassifying accelerated aging levels according to quartiles or tertiles  
243 of the PhenoAgeAccel (**Appendix 1-table 2**), exclusion of incident cancer cases  
244 occurred during the two years of follow-up (**Appendix 1-table 3**), in the unimputed  
245 data (**Appendix 1-table 4**), or in the unrelated British population (**Appendix 1-table 5**).

### 246 **Joint effect and interaction of genetic factor and PhenoAgeAccel on overall** 247 **cancer risk**

248 The overall incident cancer risk associated with both genetic risk and PhenoAgeAccel  
249 in a dose-response manner (**Figure 3**). Of participants with high genetic risk and older  
250 PhenoAge, the incidence rates of overall cancer per 100,000 person-years were  
251 estimated to be 1477.89 (95% CI, 1410.87-1544.92) in men and 1076.17 (95% CI,  
252 1014.14-1138.19) in women versus 581.06 (95% CI, 537.12-625.00) in men and  
253 594.71 (95% CI, 558.50-630.92) in women with low genetic risk and younger  
254 PhenoAge. Approximate double risks [HR, 2.29 (95% CI, 2.10-2.51) in men,  $P <$   
255  $0.0001$ ; 1.94 (95% CI, 1.78-2.11) in women,  $P < 0.0001$ ] were observed in  
256 participants with high genetic risk and older PhenoAge, compared with those with  
257 low genetic risk and younger PhenoAge. Similar patterns were noted by reclassifying  
258 accelerated aging levels into low (the bottom quintile of PhenoAgeAccel),  
259 intermediate (quintiles 2-4), and high (the top quintile) (**Appendix 1-figure 2**).  
260 However, we did not observe interaction between genetic and PhenoAgeAccel on  
261 overall cancer risk in men and women (**Appendix 1-table 6**).

### 262 **Disadvantages of older PhenoAge with overall incident cancer**

263 In further stratification analyses by genetic risk category with younger PhenoAge as  
264 the reference group, we confirmed that older PhenoAge was significantly associated  
265 with a higher incident cancer risk across genetic risk groups (**Table 3**). Among  
266 participants at high genetic risk, the standardized 5-year incident cancer rates were  
267 5.78% and 4.58% for biologically younger men and women versus 6.90% and 5.17%  
268 for those older, respectively. Similarly, among participants at low genetic risk, the  
269 standardized 5-year incident cancer rates increased from 2.71% and 2.83% for

270 biologically younger to 3.87% and 3.39% for those older in men and women,  
271 respectively. Similar patterns were noted by reclassifying accelerated aging levels into  
272 low (the bottom quintile of PhenoAgeAccel), intermediate (quintiles 2-4), and high  
273 (the top quintile) (**Appendix 1-table 7**).

274 In addition, to evaluate the implication for cancer screening in populations with  
275 different PhenoAgeAccel, we estimated the 5-year absolute risk of overall cancer  
276 between biologically younger and older participants with the increasing of age.  
277 Assuming 2% of absolute risk within the next 5 years as the threshold to be  
278 recommended for cancer screening, biologically younger men would reach the  
279 threshold at age 52, whereas those older men would reach the threshold at age 50;  
280 similarly, biologically younger women would reach the 2% of 5-year absolute risk at  
281 age 46, whereas those older women would reach the threshold at age 44 (**Figure 4**).

#### 282 **Associations of lifestyle factors with PhenoAgeAccel**

283 In the UK Biobank, biologically younger men (9.6%, 7,781/81,242) and women  
284 (14.4%, 17,781/123,648) were more likely to have favorable lifestyle (4 to 5 healthy  
285 lifestyle factors) than older men (5.7%, 5,255/92,189) and women (9.3%,  
286 7,178/77,384) (**Table 1**). Among both men and women, we observed that  
287 PhenoAgeAccel decreased with the increase of healthy lifestyle factors (**Appendix**  
288 **1-table 8**). In addition, we found a significant negative correlation between the number  
289 of healthy lifestyle factors and PhenoAgeAccel (Beta = -1.01 in men,  $P < 0.001$ ; Beta  
290 = -0.98 in women,  $P < 0.001$ ) (**Appendix 1-table 9**).

#### 291 **Discussion**

292 In this study, we calculated PhenoAgeAccel to explore the effect of accelerated aging  
293 on the risk of cancer, and demonstrated a positive association between accelerated  
294 aging and increased cancer risk after adjustment for chronological age in the UK  
295 Biobank. Meanwhile, older PhenoAge was consistently associated with an increased  
296 absolute risk of incident cancer within each genetic risk group; and participants with  
297 high genetic risk and older PhenoAge had the greatest incident cancer risk. Therefore,

298 our findings provided the first evidence for PhenoAgeAccel to be used for risk  
299 stratification of cancer, which were independent from genetic risk. Moreover, we also  
300 demonstrated that participants with older biological age often reaches the screening  
301 threshold 2 years in advance compared with biologically younger peers; and keeping a  
302 healthy lifestyle can effectively slow down the aging process.

303 Older age has been long recognized as the main risk factor for cancer, and the  
304 multistage model of carcinogenesis posits that the exponential increase in cancer  
305 incidence with age were mainly resulted from the sequential accumulation of  
306 oncogenic mutations in different tissues throughout life (Laconi, Marongiu, &  
307 DeGregori, 2020). In consistent with this, age and exposure (i.e. smoking, ultraviolet  
308 light) dependent mutation signatures have been identified in several cancers by tissue  
309 sequencing (Alexandrov et al., 2020). However, biological aging is an enormously  
310 complex process and is thought to be influenced by multiple genetic and  
311 environmental factors (van Dongen et al., 2016). Therefore, several biomarkers, i.e.  
312 ‘ageing clocks’ derived from epigenomic, transcriptomic, proteomic and metabolomic  
313 data, have been proposed to measure the biological age and predict risk of cancer and  
314 other diseases (Rutledge et al., 2022; Zhang et al., 2022). However, these measures  
315 were usually based on omics data and was not suitable for application in large  
316 population by now. As a result, results from this study would provide a cost-effective  
317 indicator for measuring of biological age as well as a novel biomarker for cancer risk  
318 prediction.

319 The associations between biological age and cancer risk has been investigated by  
320 several studies recently. Li et al. explored three DNA methylation phenotypic age and  
321 cancer risk in four subsets of a population-based cohort from Germany, and reported  
322 strong positive associations for lung cancer, while strong inverse associations for  
323 breast cancer (X. Li, Schottker, Holleczeck, & Brenner, 2022). Meanwhile, results  
324 from Melbourne Collaborative Cohort Study reported that epigenetic aging was  
325 associated with increased cancer risk of kidney cancer and B-cell lymphoma (Dugue  
326 et al., 2018). However, because of sample size, the association results were still

327 inconsistent for DNA methylation phenotypic age among different studies. Leukocyte  
328 telomere length was also significantly associated with age and were regarded as an  
329 indicator of aging. Based on data from the UK Biobank, Schneider et al. recently  
330 explored the associations between telomere length and risk of several disease, and  
331 reported significant positive associations of telomere length for lymphoid leukemia,  
332 multiple myeloma, non-Hodgkin lymphoma, esophagus cancer, while negative  
333 associations for malignant neoplasm of brain, mesothelioma, and melanoma  
334 (Schneider et al., 2022). The positive associations were in consistent with our findings,  
335 however, the negative associations were not significant in our study. Meanwhile, the  
336 study did not indicate associations for other cancers, including cancers of lung,  
337 stomach, pancreases, and kidney, which showed relatively large effects ( $HR>1.3$ ) in  
338 our study. These findings indicated that the different measures of biological age may  
339 reflect the different aspects of aging, and could be joint application in cancer risk  
340 assessment.

341 The associations between PhenoAgeAccel and increased cancer risk may be partly  
342 attribute to a result of decline in the immune system and accumulation of  
343 environmental carcinogenic factors. Recent GWASs of PhenoAgeAccel showed that  
344 SNPs associated with PhenoAgeAccel were enriched in pathways of immune system  
345 and activation of pro-inflammatory (Kuo, Pilling, Liu, Atkins, & Levine, 2021;  
346 Levine et al., 2018). In addition to genetics, behaviors (i.e. obesity, smoking, alcohol  
347 consumption, and physical activity), and life course circumstances (i.e.  
348 socioenvironmental circumstances during childhood and adulthood) were reported to  
349 account for about 30% variances of phenotypic aging (Liu et al., 2019). This was in  
350 accordance with our findings that, adherence to healthy lifestyles (involving no  
351 current smoking, normal BMI, regular physical activity, and healthy diet) could slow  
352 down the aging process. In other words, these healthy lifestyles considered in our and  
353 previous studies may be causal drivers of phenotypic aging, they represent a more  
354 targetable strategy for reducing overall cancer burden by retarding the aging process.  
355 Therefore, PhenoAge provide a meaningful intermediate phenotype that can be used

356 to guide interventions for high risk groups and track intervention efficacy (Liu et al.,  
357 2019).

358 This study has several strengths, including a large sample size, a prospective design of  
359 the UK Biobank study, and an effective application of PhenoAgeAccel in predicting  
360 risk of overall cancer. Nevertheless, we also acknowledge several limitations. First,  
361 we calculated PhenoAge based on 9 biomarkers from blood, which were measured at  
362 baseline. As such, we were unable to access the change of PhenoAgeAccel during the  
363 follow-up period. Second, previous studies have indicated that participants in the UK  
364 Biobank differ from the general UK population because of low participation and  
365 healthy volunteer bias (Fry et al., 2017). Finally, even though the findings were  
366 achieved from participants with diverse ethnic backgrounds of the UK Biobank, the  
367 generalizability of our findings should be further assessed in more diverse populations  
368 when available.

369 In summary, our study showed that accelerated aging, which was measured by  
370 PhenoAgeAccel, was consistently related to an increased risk of several site-specific  
371 cancer and overall cancer with adjustment for chronological age, within and across  
372 genetic risk groups. PhenoAgeAccel can serve as a productive tool to facilitate  
373 identification of cancer susceptible individuals, in combination with individual's  
374 genetic background, and act as an intermediate phenotype to guide interventions for  
375 high risk groups and track intervention efficacy.

376

377 **Ethics approval and consent to participate:** This research was conducted using the  
378 UK Biobank Resource (Application Number: 60169). UK Biobank has received  
379 ethics approval from the Research Ethics Committee (ref. 11/NW/0382).

380 **Availability of data and materials:** The data underlying the results presented in the  
381 study are available from the UK Biobank (<http://biobank.ndph.ox.ac.uk/showcase/>).

382 **Competing interests:** The authors declare that they have no competing interests.

383 **Funding:** This work was supported by National Natural Science Foundation of China  
384 (82230110, 82125033 to GJ; 82273714 to MZ); and the Excellent Youth Foundation  
385 of Jiangsu Province (BK20220100 to MZ).

#### 386 **Authors' Contributions**

387 **L. Bian:** Data curation, formal analysis, validation, visualization, writing–original  
388 draft, writing–review and editing. **Z. Ma:** Data curation, formal analysis, validation,  
389 visualization, writing–review and editing. **X. Fu:** Data curation, validation,  
390 visualization, writing–review and editing. **C. Ji:** Data curation, validation,  
391 visualization. **T. Wang:** Methodology, formal analysis, validation, visualization,  
392 writing–review and editing. **C. Yan:** Methodology, writing–review and editing. **J. Dai:**  
393 Methodology, writing–review and editing. **H. Ma:** Supervision, project administration,  
394 writing–review and editing. **Z. Hu:** Conceptualization, supervision, project  
395 administration, writing–review and editing. **H. Shen:** Conceptualization, resources,  
396 supervision, project administration, writing–review and editing. **L. Wang:**  
397 Conceptualization, formal analysis, supervision, validation, writing–review and  
398 editing. **M. Zhu:** Conceptualization, formal analysis, supervision, funding acquisition,  
399 validation, writing–original draft, writing–review and editing. **G. Jin:**  
400 Conceptualization, formal analysis, supervision, funding acquisition, validation,  
401 writing–review and editing.

#### 402 **Acknowledgments**

403 The authors thank the investigators and participants in UK Biobank for their  
404 contributions to this study.

405

#### 406 **References**

- 407 Alexandrov, L. B., Kim, J., Haradhvala, N. J., Huang, M. N., Tian Ng, A. W., Wu, Y., . . . Consortium, P.  
408 (2020). The repertoire of mutational signatures in human cancer. *Nature*, 578(7793), 94-101.  
409 doi: 10.1038/s41586-020-1943-3
- 410 Bray, F., Ferlay, J., Soerjomataram, I., Siegel, R. L., Torre, L. A., & Jemal, A. (2018). Global cancer  
411 statistics 2018: GLOBOCAN estimates of incidence and mortality worldwide for 36 cancers in  
412 185 countries. *CA Cancer J Clin*, 68(6), 394-424. doi: 10.3322/caac.21492



- 413 Buniello, A., MacArthur, J. A. L., Cerezo, M., Harris, L. W., Hayhurst, J., Malangone, C., . . . Parkinson, H.  
414 (2019). The NHGRI-EBI GWAS Catalog of published genome-wide association studies,  
415 targeted arrays and summary statistics 2019. *Nucleic Acids Res*, *47*(D1), D1005-D1012. doi:  
416 10.1093/nar/gky1120
- 417 Bycroft, C., Freeman, C., Petkova, D., Band, G., Elliott, L. T., Sharp, K., . . . Marchini, J. (2018). The UK  
418 Biobank resource with deep phenotyping and genomic data. *Nature*, *562*(7726), 203-209. doi:  
419 10.1038/s41586-018-0579-z
- 420 Dai, J., Lv, J., Zhu, M., Wang, Y., Qin, N., Ma, H., . . . Shen, H. (2019). Identification of risk loci and a  
421 polygenic risk score for lung cancer: a large-scale prospective cohort study in Chinese  
422 populations. *Lancet Respir Med*, *7*(10), 881-891. doi: 10.1016/S2213-2600(19)30144-4
- 423 Dugue, P. A., Bassett, J. K., Joo, J. E., Jung, C. H., Ming Wong, E., Moreno-Betancur, M., . . . Milne, R. L.  
424 (2018). DNA methylation-based biological aging and cancer risk and survival: Pooled analysis  
425 of seven prospective studies. *Int J Cancer*, *142*(8), 1611-1619. doi: 10.1002/ijc.31189
- 426 Fry, A., Littlejohns, T. J., Sudlow, C., Doherty, N., Adamska, L., Sprosen, T., . . . Allen, N. E. (2017).  
427 Comparison of Sociodemographic and Health-Related Characteristics of UK Biobank  
428 Participants With Those of the General Population. *Am J Epidemiol*, *186*(9), 1026-1034. doi:  
429 10.1093/aje/kwx246
- 430 Kuo, C. L., Pilling, L. C., Atkins, J. L., Masoli, J. A. H., Delgado, J., Tignanelli, C., . . . Levine, M. E. (2021).  
431 Biological Aging Predicts Vulnerability to COVID-19 Severity in UK Biobank Participants. *J*  
432 *Gerontol A Biol Sci Med Sci*, *76*(8), e133-e141. doi: 10.1093/gerona/glab060
- 433 Kuo, C. L., Pilling, L. C., Liu, Z., Atkins, J. L., & Levine, M. E. (2021). Genetic associations for two  
434 biological age measures point to distinct aging phenotypes. *Aging Cell*, *20*(6), e13376. doi:  
435 10.1111/accel.13376
- 436 Laconi, E., Marongiu, F., & DeGregori, J. (2020). Cancer as a disease of old age: changing mutational  
437 and microenvironmental landscapes. *Br J Cancer*, *122*(7), 943-952. doi:  
438 10.1038/s41416-019-0721-1
- 439 Lecarpentier, J., Silvestri, V., Kuchenbaecker, K. B., Barrowdale, D., Dennis, J., McGuffog, L., . . . Ottini, L.  
440 (2017). Prediction of Breast and Prostate Cancer Risks in Male BRCA1 and BRCA2 Mutation  
441 Carriers Using Polygenic Risk Scores. *J Clin Oncol*, *35*(20), 2240-2250. doi:  
442 10.1200/JCO.2016.69.4935
- 443 Levine, M. E., Lu, A. T., Quach, A., Chen, B. H., Assimes, T. L., Bandinelli, S., . . . Horvath, S. (2018). An  
444 epigenetic biomarker of aging for lifespan and healthspan. *Aging (Albany NY)*, *10*(4), 573-591.  
445 doi: 10.18632/aging.101414
- 446 Li, R., & Chambless, L. (2007). Test for additive interaction in proportional hazards models. *Ann*  
447 *Epidemiol*, *17*(3), 227-236. doi: 10.1016/j.annepidem.2006.10.009
- 448 Li, X., Schottker, B., Holleczer, B., & Brenner, H. (2022). Associations of DNA methylation algorithms of  
449 aging and cancer risk: Results from a prospective cohort study. *EBioMedicine*, *81*, 104083. doi:  
450 10.1016/j.ebiom.2022.104083
- 451 Liu, Z., Chen, X., Gill, T. M., Ma, C., Crimmins, E. M., & Levine, M. E. (2019). Associations of genetics,  
452 behaviors, and life course circumstances with a novel aging and healthspan measure:  
453 Evidence from the Health and Retirement Study. *PLoS Med*, *16*(6), e1002827. doi:  
454 10.1371/journal.pmed.1002827
- 455 Liu, Z., Kuo, P. L., Horvath, S., Crimmins, E., Ferrucci, L., & Levine, M. (2018). A new aging measure  
456 captures morbidity and mortality risk across diverse subpopulations from NHANES IV: A

457 cohort study. *PLoS Med*, *15*(12), e1002718. doi: 10.1371/journal.pmed.1002718

458 Lourida, I., Hannon, E., Littlejohns, T. J., Langa, K. M., Hypponen, E., Kuzma, E., & Llewellyn, D. J. (2019).  
459 Association of Lifestyle and Genetic Risk With Incidence of Dementia. *JAMA*, *322*(5), 430-437.  
460 doi: 10.1001/jama.2019.9879

461 Mars, N., Koskela, J. T., Ripatti, P., Kiiskinen, T. T. J., Havulinna, A. S., Lindbohm, J. V., . . . Ripatti, S.  
462 (2020). Polygenic and clinical risk scores and their impact on age at onset and prediction of  
463 cardiometabolic diseases and common cancers. *Nat Med*, *26*(4), 549-557. doi:  
464 10.1038/s41591-020-0800-0

465 Mavaddat, N., Pharoah, P. D., Michailidou, K., Tyrer, J., Brook, M. N., Bolla, M. K., . . . Garcia-Closas, M.  
466 (2015). Prediction of breast cancer risk based on profiling with common genetic variants. *J*  
467 *Natl Cancer Inst*, *107*(5). doi: 10.1093/jnci/djv036

468 Rutledge, J., Oh, H., & Wyss-Coray, T. (2022). Measuring biological age using omics data. *Nat Rev Genet*,  
469 *23*(12), 715-727. doi: 10.1038/s41576-022-00511-7

470 Schneider, C. V., Schneider, K. M., Teumer, A., Rudolph, K. L., Hartmann, D., Rader, D. J., & Strnad, P.  
471 (2022). Association of Telomere Length With Risk of Disease and Mortality. *JAMA Intern Med*,  
472 *182*(3), 291-300. doi: 10.1001/jamainternmed.2021.7804

473 Shams-White, M. M., Brockton, N. T., Mitrou, P., Romaguera, D., Brown, S., Bender, A., . . . Reedy, J.  
474 (2019). Operationalizing the 2018 World Cancer Research Fund/American Institute for Cancer  
475 Research (WCRF/AICR) Cancer Prevention Recommendations: A Standardized Scoring System.  
476 *Nutrients*, *11*(7). doi: 10.3390/nu11071572

477 Siegel, R. L., Miller, K. D., & Jemal, A. (2018). Cancer statistics, 2018. *CA Cancer J Clin*, *68*(1), 7-30. doi:  
478 10.3322/caac.21442

479 van Dongen, J., Nivard, M. G., Willemsen, G., Hottenga, J. J., Helmer, Q., Dolan, C. V., . . . Boomsma, D. I.  
480 (2016). Genetic and environmental influences interact with age and sex in shaping the human  
481 methylome. *Nat Commun*, *7*, 11115. doi: 10.1038/ncomms11115

482 Zhang, D., Leeuwenburgh, C., Zhou, D., Gong, Y., Pahor, M., Licht, J. D., & Braithwaite, D. (2022).  
483 Analysis of Biological Aging and Risks of All-Cause and Cardiovascular Disease-Specific Death  
484 in Cancer Survivors. *JAMA Netw Open*, *5*(6), e2218183. doi:  
485 10.1001/jamanetworkopen.2022.18183

486 Zhu, M., Wang, T., Huang, Y., Zhao, X., Ding, Y., Zhu, M., . . . Shen, H. (2021). Genetic Risk for Overall  
487 Cancer and the Benefit of Adherence to a Healthy Lifestyle. *Cancer Res*, *81*(17), 4618-4627.  
488 doi: 10.1158/0008-5472.CAN-21-0836

489

490 **Table 1. Baseline characteristics of participants stratified by PhenoAgeAccel categories**

|                                                  | Men (n= 173431)                 |                               | Women (n= 201032)                |                               |
|--------------------------------------------------|---------------------------------|-------------------------------|----------------------------------|-------------------------------|
|                                                  | Biologically younger<br>n=81242 | Biologically older<br>n=92189 | Biologically younger<br>n=123648 | Biologically older<br>n=77384 |
| <b>PhenoAgeAccel, median (IQR), years</b>        | -2.61 (-4.35--1.25)             | 3.28 (1.50-6.06)              | -3.55 (-5.64--1.81)              | 3.07 (1.33-5.79)              |
| <b>Age at baseline, median (IQR), years</b>      | 57.00 (49.00-62.00)             | 58.00 (50.00-64.00)           | 58.00 (51.00-63.00)              | 56.00 (48.00-62.00)           |
| <b>Height, median (IQR), centimeters</b>         | 176.00 (171.00-181.00)          | 175.00 (171.00-180.00)        | 162.50 (158.00-167.00)           | 162.00 (158.00-166.50)        |
| <b>Townsend deprivation index, median (IQR)</b>  | -2.34 (-3.76-0.16)              | -1.86 (-3.52-1.10)            | -2.33 (-3.73-0.07)               | -1.79 (-3.44-1.10)            |
| <b>Family history of cancer, n (%)</b>           |                                 |                               |                                  |                               |
| No                                               | 53907 (66.35)                   | 60654 (65.79)                 | 79800 (64.54)                    | 50924 (65.81)                 |
| Yes                                              | 27335 (33.65)                   | 31535 (34.21)                 | 43848 (35.46)                    | 26460 (34.19)                 |
| <b>Healthy lifestyle factors, n (%)</b>          |                                 |                               |                                  |                               |
| No current smoking                               | 46412 (57.13)                   | 43216 (46.88)                 | 78743 (63.68)                    | 45416 (58.69)                 |
| No alcohol consumption                           | 2064 (2.54)                     | 2828 (3.07)                   | 6221 (5.03)                      | 5459 (7.05)                   |
| Normal BMI                                       | 66120 (81.39)                   | 62654 (67.96)                 | 103054 (83.34)                   | 49003 (63.32)                 |
| Regular physical activity                        | 54346 (66.89)                   | 57733 (62.62)                 | 80629 (65.21)                    | 46468 (60.05)                 |
| Healthy diet                                     | 18540 (22.82)                   | 15486 (16.80)                 | 39547 (31.98)                    | 19826 (25.62)                 |
| <b>Healthy lifestyle<sup>a</sup>, n (%)</b>      |                                 |                               |                                  |                               |
| Favorable                                        | 7781 (9.58)                     | 5255 (5.70)                   | 17781 (14.38)                    | 7178 (9.28)                   |
| Intermediate                                     | 57683 (71.00)                   | 57489 (62.36)                 | 87272 (70.58)                    | 49324 (63.74)                 |
| Unfavorable                                      | 15778 (19.42)                   | 29445 (31.94)                 | 18595 (15.04)                    | 20882 (26.98)                 |
| <b>Albumin, median (IQR), (g/L)</b>              | 46.20 (44.62-47.85)             | 44.95 (43.28-46.64)           | 45.47 (43.87-47.12)              | 44.04 (42.42-45.70)           |
| <b>Alkaline phosphatase, median (IQR), (U/L)</b> | 75.00 (64.30-87.40)             | 82.80 (70.10-97.90)           | 78.70 (65.10-93.90)              | 86.20 (70.60-104.00)          |
| <b>Creatinine, median (IQR), (umol/L)</b>        | 77.60 (70.90-84.70)             | 82.50 (74.40-91.60)           | 61.70 (56.00-67.90)              | 65.50 (58.90-73.20)           |
| <b>Glucose, median (IQR), (mmol/l)</b>           | 4.82 (4.49-5.14)                | 5.09 (4.72-5.60)              | 4.84 (4.54-5.14)                 | 5.05 (4.70-5.55)              |

|                                                              |                     |                     |                     |                     |
|--------------------------------------------------------------|---------------------|---------------------|---------------------|---------------------|
| <b>C-reactive protein, median (IQR), (mg/dL)</b>             | 0.09 (0.05-0.16)    | 0.19 (0.10-0.36)    | 0.10 (0.05-0.20)    | 0.25 (0.12-0.51)    |
| <b>Lymphocyte percent, median (IQR), (%)</b>                 | 29.86 (25.48-34.48) | 25.60 (21.22-30.24) | 31.09 (26.58-35.80) | 27.00 (22.62-31.61) |
| <b>Mean cell volume, median (IQR), (fL)</b>                  | 90.90 (88.46-93.30) | 91.90 (89.10-94.74) | 91.10 (88.60-93.54) | 90.98 (87.64-94.02) |
| <b>Red cell distribution width, median (IQR), (%)</b>        | 13.01 (12.70-13.37) | 13.63 (13.21-14.11) | 13.10 (12.71-13.50) | 13.90 (13.40-14.55) |
| <b>White blood cell count, median (IQR), (1000 cells/uL)</b> | 6.12 (5.29-7.10)    | 7.27 (6.17-8.51)    | 6.24 (5.37-7.26)    | 7.41 (6.30-8.73)    |

491 <sup>a</sup>Healthy lifestyle was defined as favorable (4-5 healthy lifestyle factors), intermediate (2-3 healthy lifestyle factors), and unfavorable (0-1 healthy lifestyle  
492 factor).

493 **Table 2. Association between PhenoAgeAccel and cancer risk**

|       |                                      |                |              | Model 1 <sup>a</sup>   |                        | Model 2 <sup>b</sup>   |                        |
|-------|--------------------------------------|----------------|--------------|------------------------|------------------------|------------------------|------------------------|
|       |                                      | N (cases)      | Person-Years | HR (95% CI)            | P value                | HR (95% CI)            | P value                |
| Men   | <b>Per 5 years increase Category</b> | 173431 (11532) | 1190628      | 1.15 (1.13-1.17)       | 1.55×10 <sup>-54</sup> | 1.13 (1.11-1.15)       | 5.46×10 <sup>-44</sup> |
|       | Biologically younger                 | 81242 (4649)   | 564818       | Ref.                   |                        | Ref.                   |                        |
|       | Biologically older                   | 92189 (6883)   | 625810       | 1.22 (1.18-1.27)       | 5.31×10 <sup>-26</sup> | 1.19 (1.15-1.24)       | 3.18×10 <sup>-20</sup> |
|       | <b>Quintiles<sup>c</sup></b>         |                |              |                        |                        |                        |                        |
|       | Low                                  | 34687 (1864)   | 242519       | Ref.                   |                        | Ref.                   |                        |
|       | Intermediate                         | 104058 (6668)  | 716312       | 1.15 (1.09-1.21)       | 2.17×10 <sup>-7</sup>  | 1.12 (1.07-1.18)       | 8.01×10 <sup>-6</sup>  |
|       | High                                 | 34686 (3000)   | 231797       | 1.44 (1.36-1.53)       | 1.01×10 <sup>-34</sup> | 1.39 (1.31-1.47)       | 1.99×10 <sup>-27</sup> |
|       | <b>P for trend</b>                   |                |              | 3.03×10 <sup>-37</sup> |                        | 1.65×10 <sup>-29</sup> |                        |
| Women | <b>Per 5 years increase Category</b> | 201032 (10838) | 1393562      | 1.15 (1.13-1.17)       | 1.80×10 <sup>-53</sup> | 1.13 (1.11-1.15)       | 1.35×10 <sup>-41</sup> |
|       | Biologically younger                 | 123648 (6229)  | 861570       | Ref.                   |                        | Ref.                   |                        |
|       | Biologically older                   | 77384 (4609)   | 531993       | 1.26 (1.22-1.31)       | 5.91×10 <sup>-33</sup> | 1.23 (1.18-1.28)       | 2.71×10 <sup>-25</sup> |
|       | <b>Quintiles<sup>c</sup></b>         |                |              |                        |                        |                        |                        |
|       | Low                                  | 40207 (1946)   | 281912       | Ref.                   |                        | Ref.                   |                        |
|       | Intermediate                         | 120618 (6351)  | 836341       | 1.15 (1.09-1.21)       | 1.46×10 <sup>-7</sup>  | 1.13 (1.07-1.18)       | 5.89×10 <sup>-6</sup>  |
|       | High                                 | 40207 (2541)   | 275309       | 1.46 (1.38-1.55)       | 2.54×10 <sup>-36</sup> | 1.40 (1.32-1.49)       | 5.94×10 <sup>-28</sup> |
|       | <b>P for trend</b>                   |                |              | 4.23×10 <sup>-37</sup> |                        | 1.36×10 <sup>-28</sup> |                        |

494 <sup>a</sup> Cox proportional hazards regression adjusted for age, height, cancer family history, Townsend deprivation index at recruitment, and the first 10 principal  
 495 components of ancestry.

496 <sup>b</sup> Cox proportional hazards regression adjusted for Model 1, as well as cancer polygenic risk score and healthy lifestyle.

497 <sup>c</sup> Defined by quintiles of PhenoAgeAccel: low (the bottom quartile), intermediate (quintiles 2-4) and high (the top quintile).

498 Abbreviations: CI, confidence interval; HR, hazards ratio; Ref, reference.

499 **Table 3. Risk of incident cancer according to PhenoAgeAccel categories within each genetic risk level <sup>a</sup>**

| Gender | PhenoAgeAccel category                        | Low genetic risk     |                       | Intermediate genetic risk |                        | High genetic risk    |                       |
|--------|-----------------------------------------------|----------------------|-----------------------|---------------------------|------------------------|----------------------|-----------------------|
|        |                                               | Biologically younger | Biologically older    | Biologically younger      | Biologically older     | Biologically younger | Biologically older    |
| Men    | No. of cases/Person years                     | 668/114962           | 1031/124526           | 2606/338950               | 4012/376782            | 1375/110907          | 1840/124502           |
|        | Hazards ratio (95% CI)                        | Ref.                 | 1.29 (1.17-1.42)      | Ref.                      | 1.27 (1.21-1.33)       | Ref.                 | 1.10 (1.02-1.18)      |
|        | <i>P</i> value                                |                      | 3.53×10 <sup>-7</sup> |                           | 3.15×10 <sup>-21</sup> |                      | 1.07×10 <sup>-2</sup> |
|        | Absolute risk (%) - 5 years (95% CI)          | 2.71 (2.49-2.94)     | 3.87 (3.60-4.14)      | 3.57 (3.41-3.72)          | 4.95 (4.78-5.13)       | 5.78 (5.44-6.11)     | 6.90 (6.55-7.26)      |
|        | Absolute risk increase (%) - 5 years (95% CI) | Ref.                 | 1.16 (0.84-1.46)      | Ref.                      | 1.39 (1.19-1.60)       | Ref.                 | 1.13 (0.68-1.52)      |
| Women  | No. of cases/Person years                     | 1030/173195          | 761/106937            | 3579/518611               | 2704/318753            | 1620/169764          | 1144/106303           |
|        | Hazards ratio (95% CI)                        | Ref.                 | 1.25 (1.14-1.38)      | Ref.                      | 1.30 (1.24-1.37)       | Ref.                 | 1.19 (1.10-1.28)      |
|        | <i>P</i> value                                |                      | 2.65×10 <sup>-6</sup> |                           | 1.84×10 <sup>-24</sup> |                      | 8.19×10 <sup>-6</sup> |
|        | Absolute risk (%) - 5 years (95% CI)          | 2.83 (2.63-3.02)     | 3.39 (3.12-3.65)      | 3.27 (3.15-3.39)          | 4.02 (3.86-4.19)       | 4.58 (4.33-4.83)     | 5.17 (4.84-5.49)      |
|        | Absolute risk increase (%) - 5 years (95% CI) | Ref.                 | 0.56 (0.26-0.86)      | Ref.                      | 0.76 (0.57-0.93)       | Ref.                 | 0.59 (0.23-0.98)      |

500 <sup>a</sup> Cox proportional hazards regression is adjusted for age, height, family history of cancer, Townsend deprivation index, height and the first 10 principal  
501 components of ancestry.

502 Abbreviations: CI, confidence interval; Ref, reference.

503 **Figure legends**

504 **Figure 1. Association results of PhenoAgeAccel with site-specific cancer risk per**  
505 **5 years increased.** Cox proportional hazards regression adjusted for age, height,  
506 cancer family history, Townsend deprivation index at recruitment, and the first 10  
507 principal components of ancestry.

508  
509 **Figure 2. Effect of PhenoAgeAccel on the risk of incident cancer in the UK**  
510 **Biobank.** The distribution of PhenoAgeAccel between participants with incident  
511 cancer and those without incident cancer in the UK Biobank for men(A) and women  
512 (B). Participants in the UK Biobank were divided into ten equal groups according to  
513 the PhenoAgeAccel for men (C) and women (D), and the hazard ratios (HRs) of each  
514 group were compared with those in the bottom decile of PhenoAgeAccel. Error bars  
515 are 95% CIs. Standardized rates of cancer events in younger and older PhenoAge  
516 groups in the UK Biobank for men (E) and women (F). HRs and 95% CIs were  
517 estimated using Cox proportional hazard models with adjustment for age, height,  
518 family history of cancer, Townsend deprivation index, and the first 10 principal  
519 components of ancestry. Shaded areas are 95% CIs.

520  
521 **Figure 3. Risk of incident cancer according to genetic and PhenoAgeAccel**  
522 **categories in the UK Biobank for men (A) and women (B).** The HRs were  
523 estimated using Cox proportional hazard models with adjustment for age, height,  
524 family history of cancer, Townsend deprivation index, and the first 10 principal  
525 components of ancestry. Participants were divided into younger and older PhenoAge  
526 under different genetic risk groups.

527  
528 **Figure 4. Absolute risk estimates of overall cancer based on the UK Biobank for**  
529 **men (A) and women (B).** The x-axis is chronological age. The curves describe  
530 average risk of participants in younger and older PhenoAge groups. The dashed curve  
531 represents the average risk of the whole population in different ages. The red  
532 horizontal dotted line represents 2% of 5-year absolute risks of overall cancer.

533

| Cancer site (ICD-10 code)                  | No. of cases/Person years |  | HR (95% CI)      | P value                |
|--------------------------------------------|---------------------------|--|------------------|------------------------|
| <b>Lip, Oral Cavity, Pharynx (C00-C14)</b> |                           |  |                  |                        |
| Men                                        | 296/1220540               |  | 1.16 (1.04-1.29) | 0.01                   |
| Women                                      | 149/1424826               |  | 1.11 (0.96-1.30) | 0.17                   |
| <b>Oesophagus (C15)</b>                    |                           |  |                  |                        |
| Men                                        | 323/1220758               |  | 1.45 (1.32-1.59) | 1.12×10 <sup>-15</sup> |
| Women                                      | 110/1425048               |  | 1.26 (1.07-1.49) | 0.01                   |
| <b>Stomach (C16)</b>                       |                           |  |                  |                        |
| Men                                        | 209/1220987               |  | 1.35 (1.20-1.52) | 3.91×10 <sup>-7</sup>  |
| Women                                      | 83/1425127                |  | 1.27 (1.05-1.54) | 0.01                   |
| <b>Colon, Rectum (C18-C20)</b>             |                           |  |                  |                        |
| Men                                        | 1502/1217112              |  | 1.21 (1.15-1.27) | 1.64×10 <sup>-15</sup> |
| Women                                      | 1121/1422055              |  | 1.12 (1.06-1.18) | 9.96×10 <sup>-5</sup>  |
| <b>Pancreas (C25)</b>                      |                           |  |                  |                        |
| Men                                        | 287/1221125               |  | 1.29 (1.17-1.44) | 1.16×10 <sup>-6</sup>  |
| Women                                      | 231/1425010               |  | 1.29 (1.15-1.45) | 1.14×10 <sup>-5</sup>  |
| <b>Lung, Bronchus, Trachea (C33-C34)</b>   |                           |  |                  |                        |
| Men                                        | 944/1220097               |  | 1.54 (1.46-1.62) | 1.11×10 <sup>-62</sup> |
| Women                                      | 810/1423938               |  | 1.39 (1.31-1.47) | 2.47×10 <sup>-28</sup> |
| <b>Skin Melanoma (C43)</b>                 |                           |  |                  |                        |
| Men                                        | 545/1219710               |  | 0.98 (0.90-1.07) | 0.68                   |
| Women                                      | 600/1423192               |  | 1.00 (0.92-1.08) | 0.97                   |
| <b>Breast (C50)</b>                        |                           |  |                  |                        |
| Women                                      | 4553/1409789              |  | 1.07 (1.04-1.10) | 1.52×10 <sup>-6</sup>  |
| <b>Cervix Uteri (C53)</b>                  |                           |  |                  |                        |
| Women                                      | 59/1425046                |  | 1.27 (1.01-1.60) | 0.04                   |
| <b>Corpus Uteri, NOS (C54-C55)</b>         |                           |  |                  |                        |
| Women                                      | 724/1422850               |  | 1.27 (1.19-1.36) | 2.99×10 <sup>-13</sup> |
| <b>Ovary (C56)</b>                         |                           |  |                  |                        |
| Women                                      | 476/1423963               |  | 1.10 (1.00-1.20) | 0.04                   |
| <b>Prostate (C61)</b>                      |                           |  |                  |                        |
| Men                                        | 4736/1206048              |  | 0.94 (0.91-0.96) | 1.42×10 <sup>-5</sup>  |
| <b>Testis (C62)</b>                        |                           |  |                  |                        |
| Men                                        | 58/1221139                |  | 1.14 (0.88-1.49) | 0.32                   |
| <b>Kidney (C64)</b>                        |                           |  |                  |                        |
| Men                                        | 401/1220361               |  | 1.26 (1.15-1.38) | 3.07×10 <sup>-7</sup>  |
| Women                                      | 217/1424679               |  | 1.57 (1.41-1.74) | 1.86×10 <sup>-16</sup> |
| <b>Bladder (C67)</b>                       |                           |  |                  |                        |
| Men                                        | 399/1220186               |  | 1.17 (1.06-1.28) | 1.14×10 <sup>-3</sup>  |
| Women                                      | 125/1424878               |  | 1.39 (1.20-1.61) | 9.07×10 <sup>-6</sup>  |
| <b>Brain, Central Nerves (C70-C72)</b>     |                           |  |                  |                        |
| Men                                        | 226/1221108               |  | 1.13 (1.00-1.28) | 0.05                   |
| Women                                      | 154/1425069               |  | 0.95 (0.81-1.12) | 0.52                   |
| <b>Thyroid (C73)</b>                       |                           |  |                  |                        |
| Men                                        | 53/1221160                |  | 0.98 (0.75-1.30) | 0.91                   |
| Women                                      | 145/1424740               |  | 1.06 (0.91-1.24) | 0.46                   |
| <b>Hodgkin's Disease (C81)</b>             |                           |  |                  |                        |
| Men                                        | 37/1221245                |  | 1.34 (1.01-1.78) | 0.04                   |
| Women                                      | 29/1425138                |  | 1.37 (0.99-1.88) | 0.05                   |
| <b>Multiple Myeloma (C90)</b>              |                           |  |                  |                        |
| Men                                        | 201/1220867               |  | 1.16 (1.01-1.32) | 0.03                   |
| Women                                      | 156/1424868               |  | 1.18 (1.02-1.37) | 0.02                   |
| <b>Lymphoid Leukaemia (C91)</b>            |                           |  |                  |                        |
| Men                                        | 195/1220782               |  | 1.29 (1.14-1.47) | 7.72×10 <sup>-5</sup>  |
| Women                                      | 128/1424821               |  | 1.25 (1.07-1.46) | 0.01                   |

0.5 1.0 1.5 2.0



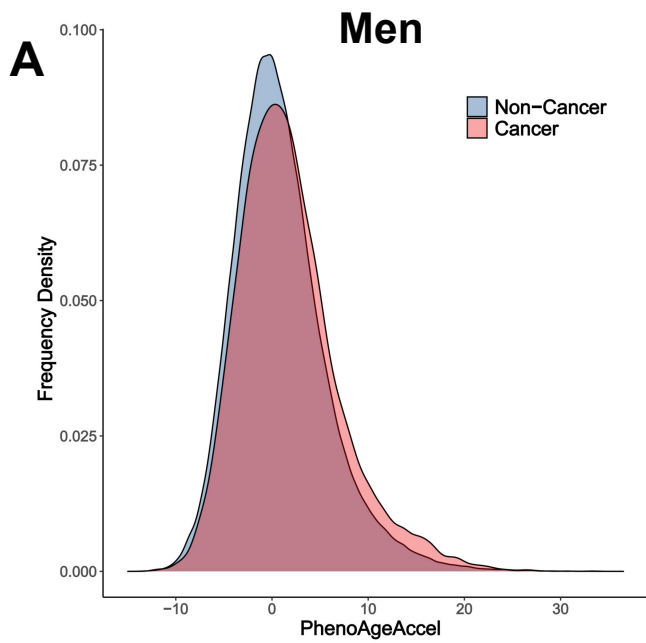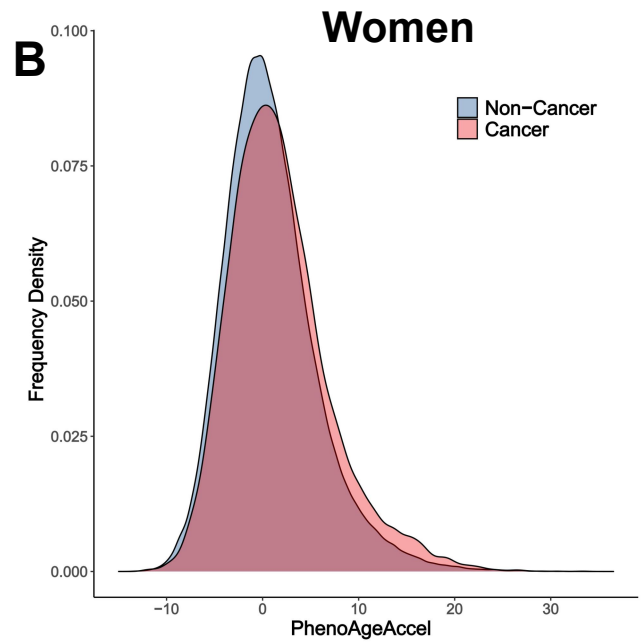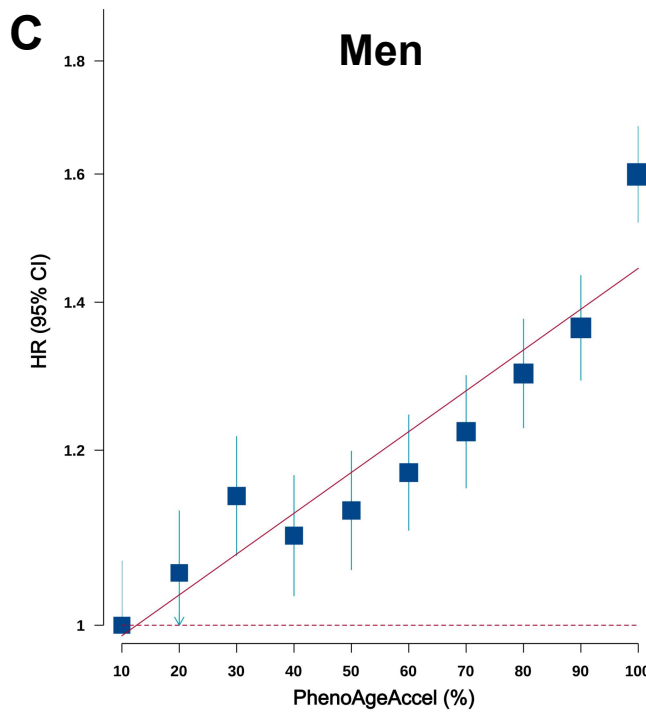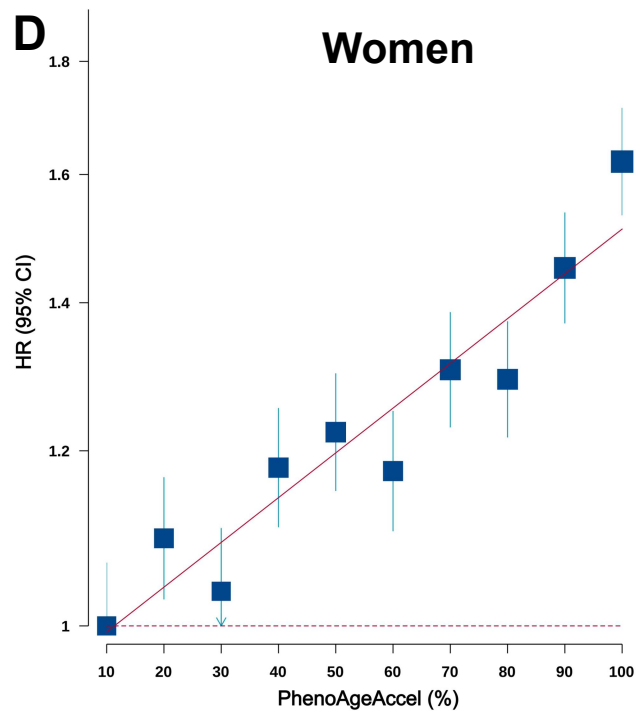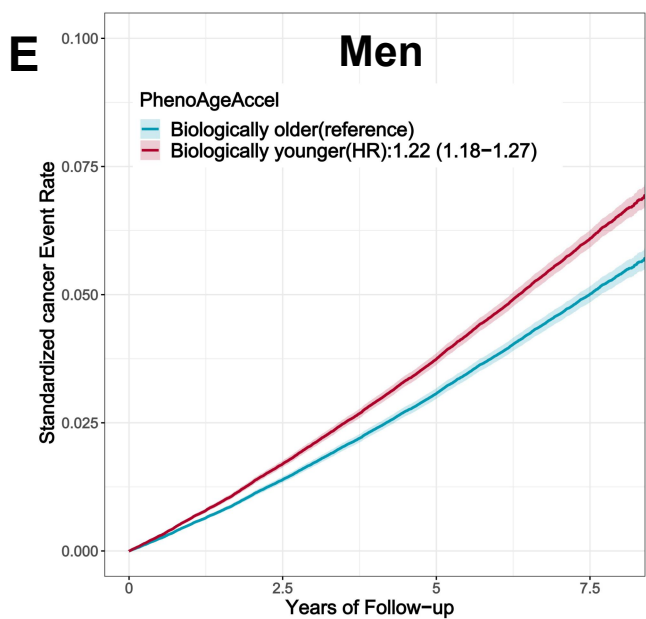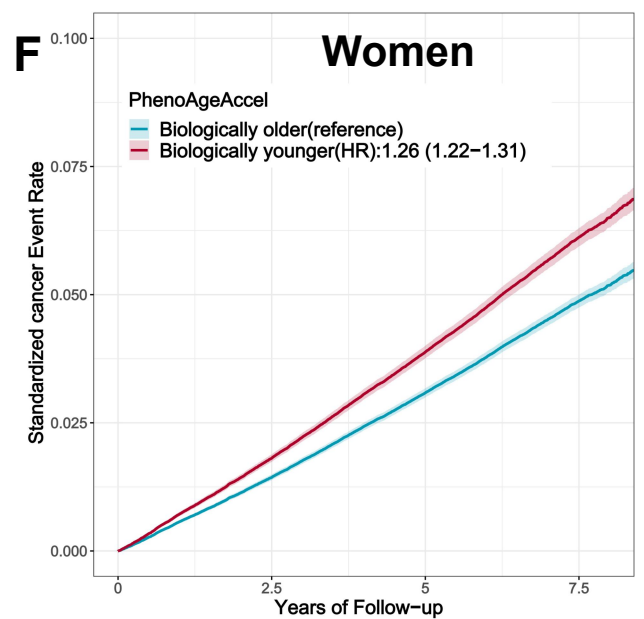

**A**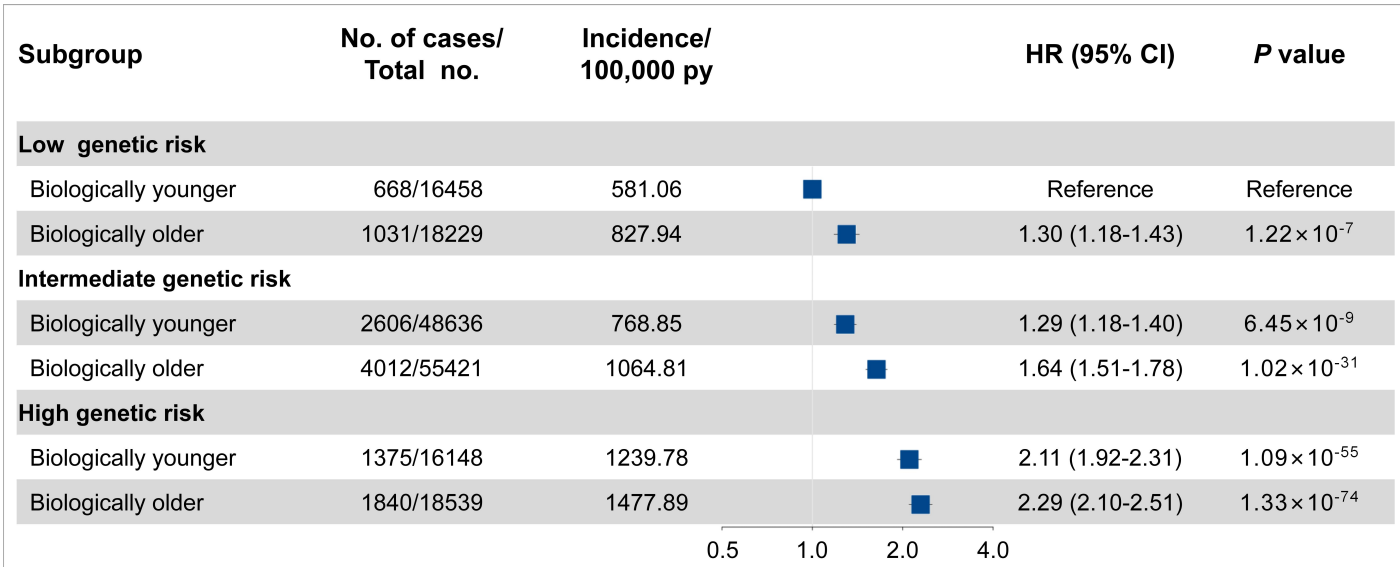**B**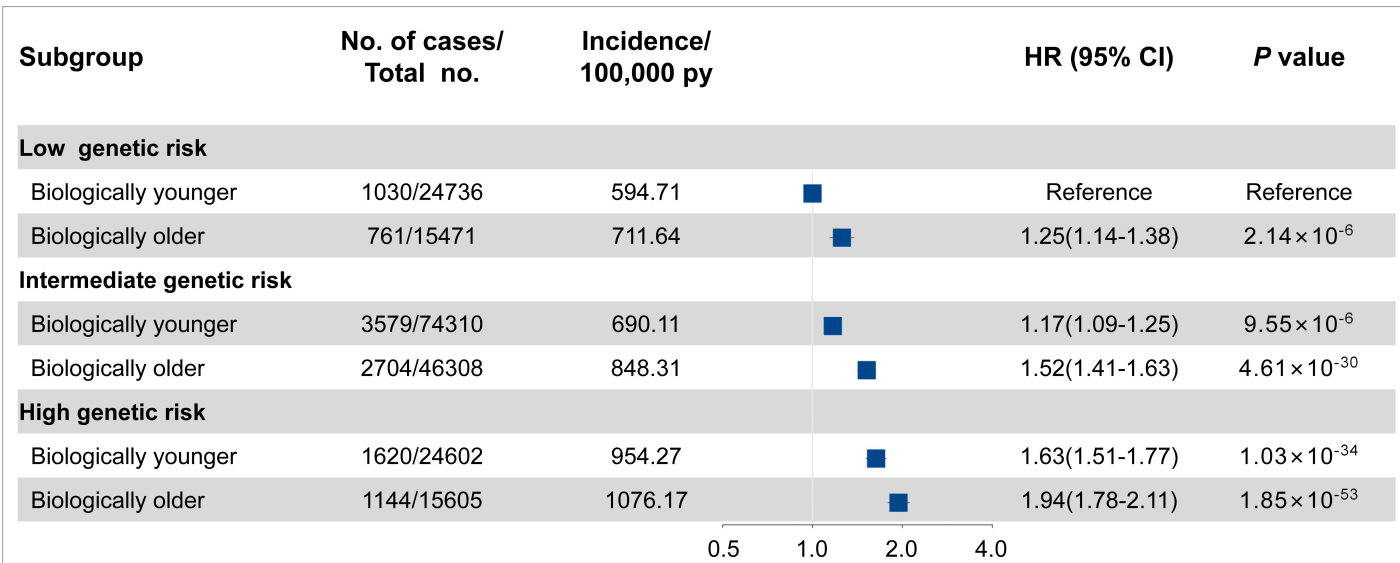

**A**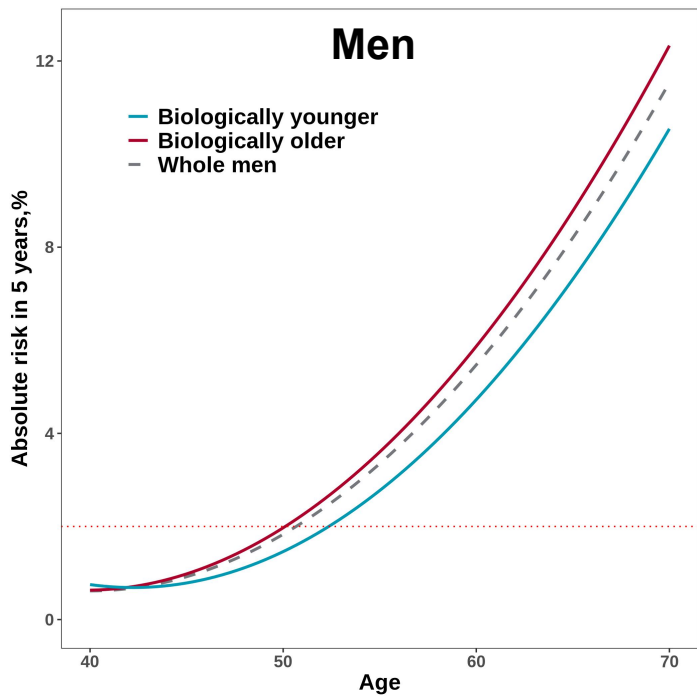**B**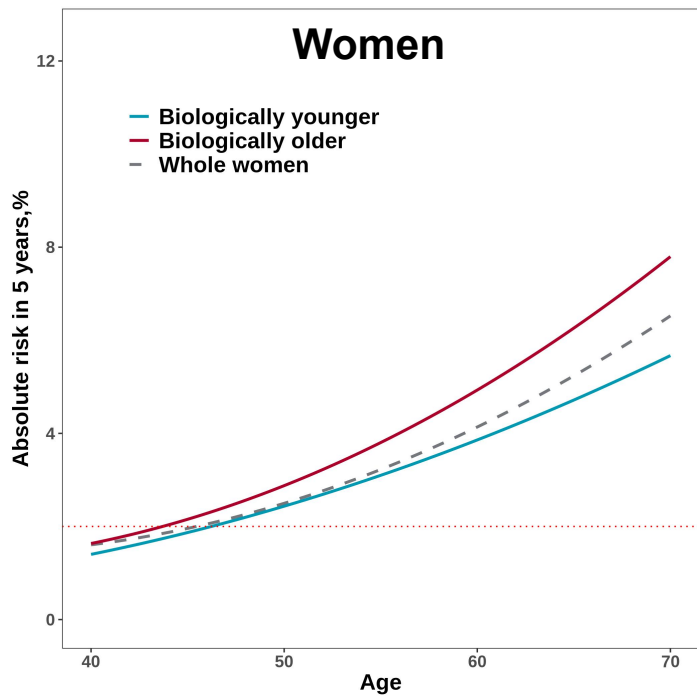

Source: https://medrxiv.org/content/10.1101/2023.09.27.23296204v1.full.pdf
